# Supplementary material for: Genetic Evidence for Hybrid Trait Speciation in Heliconius Butterflies
Source: PLOS journal article supplement (doi:10.1371/journal.pgen.1000930), 2010-04-29
Supplement: S1 (10.1371/journal.pgen.1000930.s001) [file journal.pgen.1000930.s001]

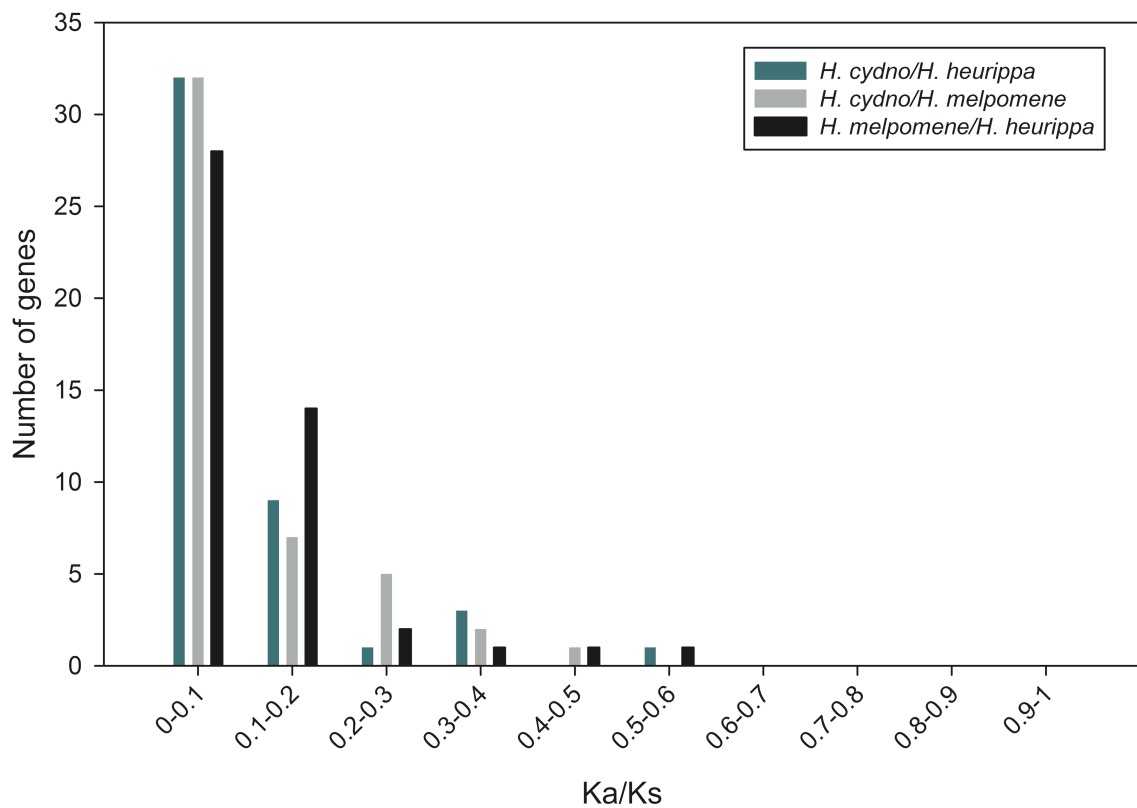

**Figure S1. Protein evolution analysis via Ka/Ks ratios.** The distribution of ka/ks ratios for all genes for each species pair is shown. h: *H. heurippa*, m: *H. m. melpomene* and c: *H. c. cordula*. None of the comparisons had ka/ks >1, suggesting a lack of strong evidence for positive selection.
